# Supplementary material
Source: Springer Nature journal article supplement (https://www.springermedizin.de/resource/supplementary/12911_2010_389_MOESM3_ESM.pdf/9525626)
Supplement: MOESM3 [file 9525626]

Patient

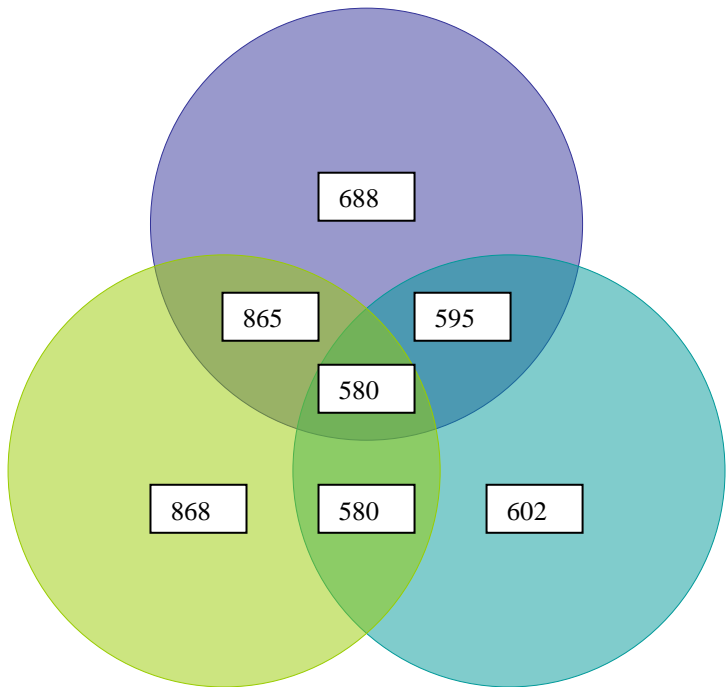

Provider

Print

None = 679

Patient (patients received mailed report cards) = 2,728

Provider (patients identified on enhanced provider report card) = 2,893

Print (patients attended clinics that distributed report cards at visits) = 2,357

Total = 5,457
